# Supplementary material
Source: publisher figshare collection journal article supplement (https://acs.figshare.com/ndownloader/files/11095982)
Supplement: Supplementary file 1 [file 11095982]

# [Ag<sub>2</sub>M(Te<sub>2</sub>O<sub>5</sub>)<sub>2</sub>]SO<sub>4</sub> (M = Ce<sup>IV</sup> or Th<sup>IV</sup>): A New Purely Inorganic *d/f*-Heterometallic Cationic Material

Todd N. Poe<sup>1</sup>, Frankie D. White<sup>2</sup>, Vanessa Proust<sup>2</sup>, Eric M. Villa<sup>3</sup>, Matthew J. Polinski<sup>1\*</sup>

\* polinskimj@gmail.com

<sup>1</sup>Department of Chemistry and Biochemistry, 400 E. 2nd Street, Bloomsburg University of Pennsylvania, Bloomsburg, Pennsylvania 17815.

<sup>2</sup>Department of Chemistry and Biochemistry, 95 Chieftan Way, Florida State University, Tallahassee, Florida 32306.

<sup>3</sup>Department of Chemistry, Creighton University, 2500 California Plaza, Omaha, Nebraska 68178.

## Supporting Information

| Table of Contents                                                                                              | Page    |
|----------------------------------------------------------------------------------------------------------------|---------|
| Experimental – Synthesis and Characterization                                                                  | S2 – S3 |
| Crystallographic Data                                                                                          | S4 – S7 |
| Bond Valence Sum Data for [Ag <sub>2</sub> Ce(Te <sub>2</sub> O <sub>5</sub> ) <sub>2</sub> ]SO <sub>4</sub>   | S8      |
| UV-vis-NIR Spectroscopy for [Ag <sub>2</sub> Ce(Te <sub>2</sub> O <sub>5</sub> ) <sub>2</sub> ]SO <sub>4</sub> | S9      |
| Scanning Electron Microscopy/Energy Dispersive Spectroscopy                                                    | S10     |
| UV-vis-NIR Spectroscopy for [Ag <sub>2</sub> Th(Te <sub>2</sub> O <sub>5</sub> ) <sub>2</sub> ]SO <sub>4</sub> | S11     |
| References                                                                                                     | S12     |

## Experimental Section

### Synthesis.

*Caution! Th-232 used in this study is an  $\alpha$ -emitter, producing the radioactive Ra-228 daughter. All of the thorium experiments were conducted in a laboratory dedicated for actinide element studies with approved safety operating procedures.*

ThO<sub>2</sub> (99.99%, Puratrem), CeO<sub>2</sub> (99.5%, Alfa Aesar), TeO<sub>2</sub> (99.99%, Alfa Aesar), AgNO<sub>3</sub> (99.9+%, Alfa Aesar), H<sub>2</sub>SO<sub>4</sub> (ACS Reagent Grade, 18 M, Pharmco-Aaper) were all reagent grade and used as received with no further purification. Reactions were run in PTFE-lined Parr 4749 autoclaves with a 23 mL internal volume. Distilled and Millipore filtered water was used in all reactions.

[Ag<sub>2</sub>M(Te<sub>2</sub>O<sub>5</sub>)<sub>2</sub>]<sub>2</sub>SO<sub>4</sub> (M = Ce<sup>IV</sup>, Th<sup>IV</sup>). TeO<sub>2</sub> (1.00 mmol, 0.1596 g), AgNO<sub>3</sub> (1.00 mmol, 0.1699 g), 1.0 M H<sub>2</sub>SO<sub>4</sub> (1.00 mmol, 1.00 mL), 1.00 mL H<sub>2</sub>O, and either CeO<sub>2</sub> (1.00 mmol, 0.1721 g) or ThO<sub>2</sub> (1.00 mmol, 0.2640 g) were charged into a PTFE-lined Parr 4749 autoclave with a 23 mL internal volume. This provides a M:Te:Ag molar ratio of 1:1:1. The autoclave was sealed and heated to 230 °C for three days under autogenous pressure followed by cooling at a rate of 3 °C hr<sup>-1</sup>. The resulting crystalline materials were washed extensively with boiling deionized water to remove any excess reactants. The products consisted of either orange (Ce) or colorless (Th) columnar crystals and were present in *ca.* 70% yield for both reactions. It should be noted that the cerium analogue can also be produced by replacing CeO<sub>2</sub> with (NH<sub>4</sub>)<sub>2</sub>Ce(NO<sub>3</sub>)<sub>6</sub> under the conditions listed above.

**Crystallographic Studies.** Crystals of both compounds were mounted on CryoLoops with Krytox oil and optically aligned on a diffractometer using a digital camera.

[Ag<sub>2</sub>Th(Te<sub>2</sub>O<sub>5</sub>)<sub>2</sub>]<sub>2</sub>SO<sub>4</sub>. Crystallographic analysis of this compound was performed on a Bruker D8 Quest x-ray diffractometer. Initial intensity measures were performed using a I $\mu$ S x-ray source (Mo K $\alpha$ ,  $\lambda$  = 0.71073 Å) with high-brilliance and high-performance focusing multi-layered optics. QUEST software was used for determination of the unit cells and data collection control. The intensities of reflections of a sphere were collected by a combination of multiple sets of exposures (frames). Each set had a different  $\phi$  angle for the crystal and each exposure covered a range of 0.5 ° in  $\omega$ . Single crystals of this compound were run at 273 K. SAINT software was used for data integration including Lorentz and polarization corrections. Semiempirical absorption corrections were applied using the program SCALE (SADABS).<sup>1</sup> Solutions were checked for missed symmetry and solvent accessible voids using PLATON.<sup>2</sup> Selected crystallographic information is listed in Table 1.

[Ag<sub>2</sub>Ce(Te<sub>2</sub>O<sub>5</sub>)<sub>2</sub>]<sub>2</sub>SO<sub>4</sub>. Crystallographic analysis of this compound was performed on a Rigaku SCX-Mini Single-Crystal X-ray diffractometer equipped with a Mercury2 (2x2 bin mode) diffractometer. The crystal was kept at 293 K during data collection. Initial matrix

images were collected to determine the unit cell and proper exposure time. Three hemispheres (where  $\varphi = 0.0, 120.0, \text{ and } 240.0$ ) of data were collected with each consisting of 180 images each with  $1.00^\circ$  widths and  $1.00^\circ$  steps. Using Olex2, the structure was solved with the ShelXT<sup>3</sup> structure solution program using Direct Methods and refined with the ShelXL refinement package using Least Squares minimization.<sup>4,6</sup>

Solutions for both compounds were checked for missed symmetry and solvent accessible voids using PLATON.<sup>2</sup> Selected crystallographic information is listed in Table S1. Atomic coordinates for both compounds are provided in Tables S3 and S4. The Crystallographic Information File (CIF) is available from the Cambridge Crystal Structure Database Center: 1819474 ( $[\text{Ag}_2\text{Ce}(\text{Te}_2\text{O}_5)_2]\text{SO}_4$ ) and 1819475 ( $[\text{Ag}_2\text{Th}(\text{Te}_2\text{O}_5)_2]\text{SO}_4$ )

**UV-vis-NIR Spectroscopy.** Solid state UV-vis-NIR data were collected on clusters of single crystals using a Craic Technologies 508 PV Microscope Spectrophotometer equipped with a 1.3 MP high sensitivity digital imaging system. Samples were mounted onto glass slides and data collected from 350 – 850 nm (Figure S1). Exposure time and sampling rate were auto-optimized using Craic's LambdaFire Control and Analysis software.

**Scanning Electron Microscopy (SEM)/Energy-Dispersive Spectroscopy (EDS).** Scanning electron microscopy (SEM) images and Energy-dispersive spectroscopy (EDS) data were collected using a FEI Nova nanoSEM 400 with an Oxford INCA x-sight EDS detector. The energy of the electron beam was 3.00 kV for the SEM images and 20.0 kV for EDS data. The spectrum acquisition time was 60 s. All data were calibrated with standards and the EDS results for  $[\text{Ag}_2\text{Ce}(\text{Te}_2\text{O}_5)_2]\text{SO}_4$  is provided in the Figure S2. The observed weight percent of each element help to confirm the overall chemical formula for the structure.

**Table S1.** Crystallographic Data for [Ag<sub>2</sub>Ce(Te<sub>2</sub>O<sub>5</sub>)<sub>2</sub>]SO<sub>4</sub> and [Ag<sub>2</sub>Th(Te<sub>2</sub>O<sub>5</sub>)<sub>2</sub>]SO<sub>4</sub>.

| Compound                                    | [Ag <sub>2</sub> Ce(Te <sub>2</sub> O <sub>5</sub> ) <sub>2</sub> ]SO <sub>4</sub> | [Ag <sub>2</sub> Th(Te <sub>2</sub> O <sub>5</sub> ) <sub>2</sub> ]SO <sub>4</sub> |
|---------------------------------------------|------------------------------------------------------------------------------------|------------------------------------------------------------------------------------|
| Mass                                        | 1122.32                                                                            | 1214.24                                                                            |
| Color and habit                             | Orange,<br>Column                                                                  | Colorless,<br>Column                                                               |
| Space group                                 | <i>Cmca</i>                                                                        | <i>Cmca</i>                                                                        |
| <i>a</i> (Å)                                | 15.5581(4)                                                                         | 15.6795(13)                                                                        |
| <i>b</i> (Å)                                | 10.7450(3)                                                                         | 10.8699(2)                                                                         |
| <i>c</i> (Å)                                | 15.6309(4)                                                                         | 15.7334(13)                                                                        |
| <i>V</i> (Å <sup>3</sup> )                  | 2613.05(13)                                                                        | 2681.5(4)                                                                          |
| <i>Z</i>                                    | 8                                                                                  | 8                                                                                  |
| <i>T</i> (K)                                | 293(2)                                                                             | 273(2)                                                                             |
| $\lambda$ (Å)                               | 0.71073                                                                            | 0.71073                                                                            |
| Maximum<br>$2\theta$ (deg.)                 | 30.505                                                                             | 34.938                                                                             |
| $\rho_{\text{calcd}}$ (g cm <sup>-3</sup> ) | 5.706                                                                              | 6.015                                                                              |
| $\mu$ (Mo <i>K</i> $\alpha$ )               | 15.383                                                                             | 22.718                                                                             |
| $R(F)$ for $F_o^2 > 2\sigma(F_o^2)^a$       | 0.0322                                                                             | 0.0458                                                                             |
| $R_w(F_o^2)^b$                              | 0.0711                                                                             | 0.0923                                                                             |

$$^a R(F) = \Sigma \| F_o \| - \| F_c \| / \Sigma \| F_o \|$$

$$^b R(F_o^2) = [\Sigma w(F_o^2 - F_c^2)^2 / \Sigma w(F_o^4)]^{1/2}$$

**Table S2.** Selected bond distances (Å) for [Ag<sub>2</sub>Ce(Te<sub>2</sub>O<sub>5</sub>)<sub>2</sub>]SO<sub>4</sub> and [Ag<sub>2</sub>Th(Te<sub>2</sub>O<sub>5</sub>)<sub>2</sub>]SO<sub>4</sub>.

| Distance (Å) |          |            |          | Distance (Å) |          |            |           |
|--------------|----------|------------|----------|--------------|----------|------------|-----------|
| Ce(1)-O(2)   | 2.350(4) | Ag(1)-O(2) | 2.209(4) | Th(1)-O(2)   | 2.413(6) | Ag(1)-O(2) | 2.217(7)  |
| Ce(1)-O(3)   | 2.332(4) | Ag(2)-O(5) | 2.315(4) | Th(1)-O(3)   | 2.370(6) | Ag(2)-O(5) | 2.314(7)  |
| Ce(1)-O(4)   | 2.290(4) | Ag(2)-O(6) | 2.423(6) | Th(1)-O(4)   | 2.357(6) | Ag(2)-O(6) | 2.489(10) |
| Ce(1)-O(5)   | 2.377(4) |            |          | Th(1)-O(5)   | 2.426(6) |            |           |
| Te(1)-O(1)   | 1.925(2) | S(1)-O(7)  | 1.460(9) | Te(1)-O(1)   | 1.903(3) | S(1)-O(7)  | 1.449(16) |
| Te(1)-O(2)   | 1.868(4) | S(1)-O(8)  | 1.465(7) | Te(1)-O(2)   | 1.867(6) | S(1)-O(8)  | 1.479(11) |
| Te(1)-O(3)   | 1.885(4) | S(1)-O(9)  | 1.476(8) | Te(1)-O(3)   | 1.872(6) | S(1)-O(9)  | 1.440(14) |
| Te(2)-O(4)   | 1.886(4) |            |          | Te(2)-O(4)   | 1.871(6) |            |           |
| Te(2)-O(5)   | 1.858(4) |            |          | Te(2)-O(5)   | 1.868(6) |            |           |
| Te(2)-O(6)   | 1.946(2) |            |          | Te(2)-O(6)   | 1.928(4) |            |           |

**Table S3.** Atomic coordinates (  $\times 10^4$ ) and equivalent isotropic displacement parameters ( $\text{\AA}^2 \times 10^3$ ) for  $[\text{Ag}_2\text{Ce}(\text{Te}_2\text{O}_5)_2]\text{SO}_4$ .  $U(\text{eq})$  is defined as one third of the trace of the orthogonalized  $U_{ij}$  tensor.

|       | x       | y        | z       | $U(\text{eq})$ |
|-------|---------|----------|---------|----------------|
| Ce(1) | 2500    | 2456(1)  | 7500    | 9(1)           |
| Te(1) | 3593(1) | -175(1)  | 6181(1) | 10(1)          |
| Te(2) | 3833(1) | 5147(1)  | 6418(1) | 10(1)          |
| Ag(1) | 2500    | -2500    | 5000    | 39(1)          |
| Ag(2) | 5000    | 7595(1)  | 7684(1) | 36(1)          |
| S(1)  | 5000    | 7521(2)  | 4895(2) | 16(1)          |
| O(1)  | 3262(5) | 0        | 5000    | 21(1)          |
| O(2)  | 2931(3) | -1626(4) | 6205(3) | 15(1)          |
| O(3)  | 2684(3) | 906(4)   | 6472(3) | 15(1)          |
| O(4)  | 3493(3) | 3990(4)  | 7260(3) | 16(1)          |
| O(5)  | 3833(3) | 6490(4)  | 7167(3) | 14(1)          |
| O(6)  | 5000    | 4685(6)  | 6733(4) | 16(1)          |
| O(7)  | 5000    | 6376(9)  | 5398(7) | 55(3)          |
| O(8)  | 4232(5) | 7556(7)  | 4353(4) | 55(2)          |
| O(9)  | 5000    | 8572(8)  | 5504(6) | 43(2)          |

**Table S4.** Atomic coordinates ( $\times 10^4$ ) and equivalent isotropic displacement parameters ( $\text{\AA}^2 \times 10^3$ ) for  $[\text{Ag}_2\text{Ce}(\text{Te}_2\text{O}_5)_2]\text{SO}_4$ .  $U(\text{eq})$  is defined as one third of the trace of the orthogonalized  $U_{ij}$  tensor.

|       | x       | y        | z        | $U(\text{eq})$ |
|-------|---------|----------|----------|----------------|
| Th(1) | 2500    | 2443(1)  | 7500     | 9(1)           |
| Te(1) | 3595(1) | -169(1)  | 6159(1)  | 12(1)          |
| Te(2) | 3849(1) | 5120(1)  | 6412(1)  | 12(1)          |
| Ag(1) | 2500    | -2500    | 5000     | 52(1)          |
| Ag(2) | 5000    | 7572(1)  | 7665(1)  | 42(1)          |
| S(1)  | 5000    | 7525(3)  | 4897(2)  | 25(1)          |
| O(1)  | 3266(7) | 0        | 5000     | 32(2)          |
| O(2)  | 2943(5) | -1605(6) | 6187(4)  | 22(1)          |
| O(3)  | 2703(4) | 888(6)   | 6464(4)  | 19(1)          |
| O(4)  | 3512(4) | 4006(6)  | 7254(4)  | 21(1)          |
| O(5)  | 3848(4) | 6478(6)  | 7140(4)  | 21(1)          |
| O(6)  | 5000    | 4680(10) | 6718(7)  | 22(2)          |
| O(7)  | 5000    | 6363(15) | 5348(14) | 76(6)          |
| O(8)  | 4244(8) | 7549(13) | 4335(8)  | 68(4)          |
| O(9)  | 5000    | 8559(14) | 5469(13) | 67(5)          |

**Table S5.** Bond Valence Sum (BVS) Data for [Ag<sub>2</sub>Ce(Te<sub>2</sub>O<sub>5</sub>)<sub>2</sub>]SO<sub>4</sub>. BVS parameters provide complementary evidence supporting the oxidation state assignments. Specific parameters and values for each metal center were obtained from Refs. 7 and 8.

$$vu = \exp[(R_0 - d)/b].$$

|             |       | d                | vu           |
|-------------|-------|------------------|--------------|
| R(0) : Ce-O | 2.094 | Ce(1)-O(2)       | 2.35 0.501   |
| b           | 0.37  | Ce(1)-O(2)       | 2.35 0.501   |
|             |       | Ce(1)-O(3)       | 2.332 0.526  |
|             |       | Ce(1)-O(3)       | 2.332 0.526  |
|             |       | Ce(1)-O(4)       | 2.29 0.589   |
|             |       | Ce(1)-O(4)       | 2.29 0.589   |
|             |       | Ce(1)-O(5)       | 2.377 0.465  |
|             |       | Ce(1)-O(5)       | 2.377 0.465  |
|             |       | <b>Ce(1) BVS</b> | <b>4.161</b> |

|             |       | d                | vu           |
|-------------|-------|------------------|--------------|
| R(0) : Ag-O | 1.805 | Ag(1)-O(2)       | 2.209 0.336  |
| b           | 0.37  | Ag(1)-O(2)       | 2.209 0.336  |
|             |       | <b>Ag(1) BVS</b> | <b>0.671</b> |

|             |       | d                | vu           |
|-------------|-------|------------------|--------------|
| R(0) : Ag-O | 1.805 | Ag(2)-O(5)       | 2.315 0.252  |
| b           | 0.37  | Ag(2)-O(5)       | 2.315 0.252  |
|             |       | Ag(2)-O(6)       | 2.423 0.188  |
|             |       | <b>Ag(2) BVS</b> | <b>0.692</b> |

|             |       | d                | vu           |
|-------------|-------|------------------|--------------|
| R(0) : Te-O | 1.977 | Te(1)-O(1)       | 1.925 1.151  |
| b           | 0.37  | Te(1)-O(2)       | 1.868 1.343  |
|             |       | Te(1)-O(3)       | 1.885 1.282  |
|             |       | <b>Te(1) BVS</b> | <b>3.776</b> |

|             |       | d                | vu           |
|-------------|-------|------------------|--------------|
| R(0) : Te-O | 1.977 | Te(2)-O(4)       | 1.886 1.279  |
| b           | 0.37  | Te(2)-O(5)       | 1.858 1.379  |
|             |       | Te(2)-O(6)       | 1.946 1.087  |
|             |       | <b>Te(2) BVS</b> | <b>3.746</b> |



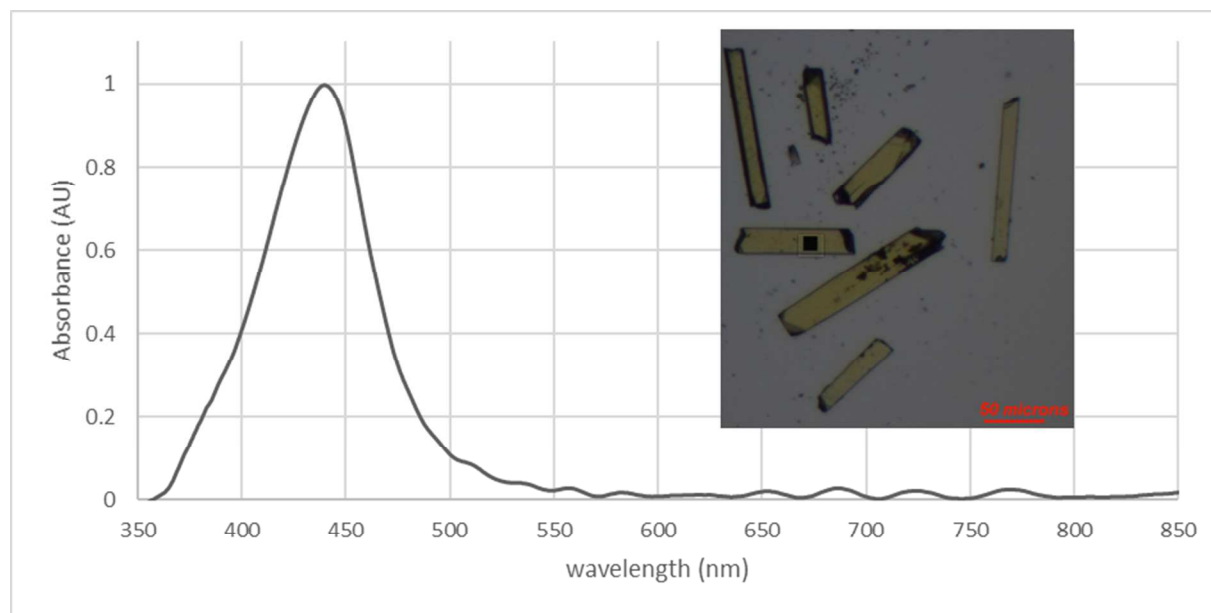

**Figure S1.** Normalized UV-vis-NIR spectrum of  $[\text{Ag}_2\text{Ce}(\text{Te}_2\text{O}_5)_2]\text{SO}_4$  showing the characteristic charge-transfer band of Ce(IV).

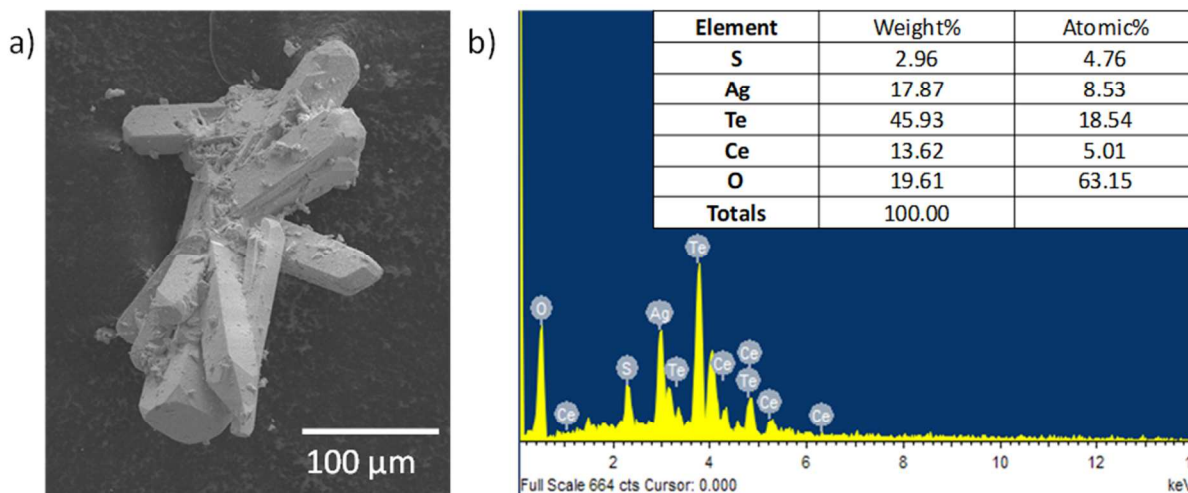

**Figure S2.** (a) Image of crystal surface obtained from Scanning Electron Microscopy (SEM) and (b) elemental analysis of Energy Dispersive Spectroscopy (EDS) spectrum for  $[\text{Ag}_2\text{Ce}(\text{Te}_2\text{O}_5)_2]\text{SO}_4$ . Based on the EDS data, the measured composition is  $\text{Ag}_{1.9}\text{Ce}_{1.1}\text{Te}_{4.0}\text{O}_{13.63}\text{S}_{1.0}$  which closely matches the theoretical composition of  $\text{Ag}_2\text{Ce}_1\text{Te}_4\text{O}_{14}\text{S}$ .

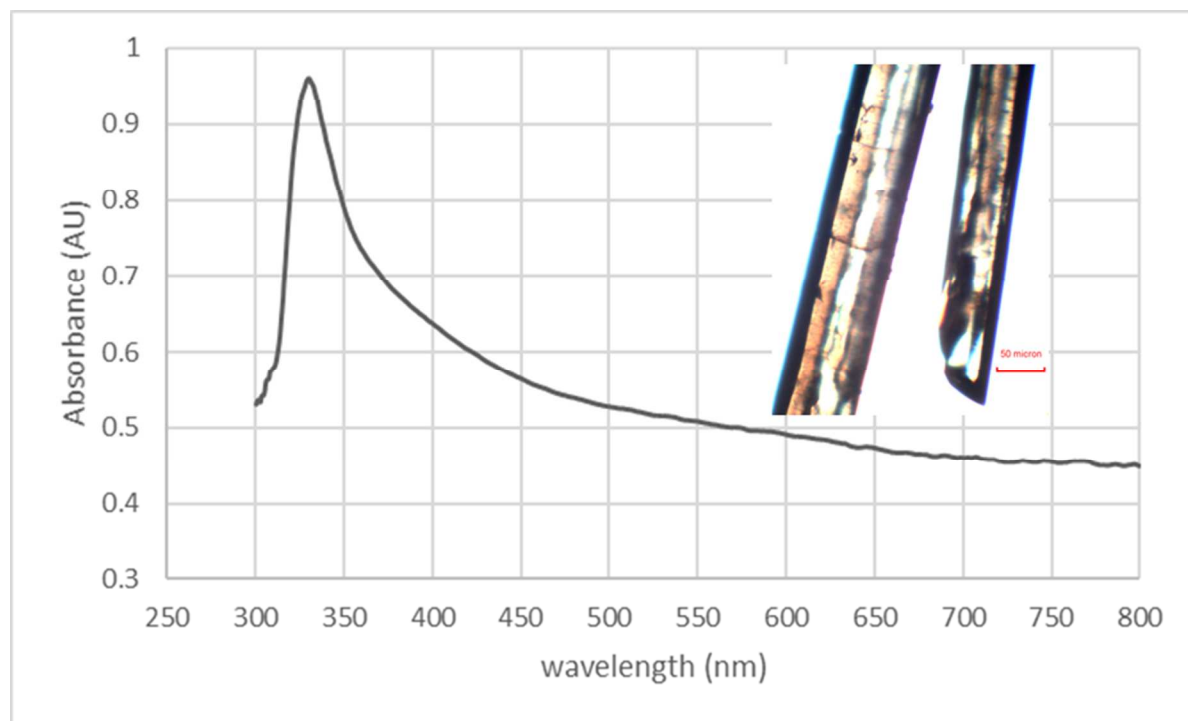

**Figure S3.** UV-vis-NIR spectrum of  $[\text{Ag}_2\text{Th}(\text{Te}_2\text{O}_5)_2]\text{SO}_4$  showing the characteristic charge-transfer band of Th(IV).

## References

- 1.) Sheldrick, G. M. (2012). *TWINABS*. Version 2012/1. Georg-August-Universität Göttingen, Göttingen, Germany.
- 2.) Spek, A. L. Single-Crystal Structure Validation with the Program PLATON. *J. Appl. Cryst.* **2003**, 36, 7-13.
- 3.) Sheldrick, G. M. Crystal Structure Refinement with SHELXL. *Acta Cryst.* **2015**, C71, 3-8.
- 4.) Dolomanov, O.V.; Bourhis, L. J.; Gildea, R. J.; Howard, J. A. K.; Puschmann, H. OLEX2: A Complete Structure Solution, Refinement and Analysis Program. *J. Appl. Cryst.* **2009**, 42, 339-341.
- 5.) Sheldrick, G.M. A Short History of SHELX. *Acta Cryst.* **2008**, A64, 112-122.
- 6.) Sheldrick, G.M. SHELXT – Integrated Space-Group and Crystal-Structure Determination. *Acta Cryst.* **2015**, A71, 3-8.
- 7.) Brese, N. E.; O’Keeffe, M. Bond-Valence Parameters for Solids. *Acta Cryst.* **1991**, B47, 192-197.
- 8.) Roulhac, P. L.; Palenik, G. J. Bond Valence Sums in Coordination Chemistry. The Calculation of the Oxidation State of Cerium Complexes Containing Cerium Bonded Only to Oxygen. *Inorg. Chem.* **2003**, 42, 118-121.
